# Supplementary material for: Identification of Follow-Up Markers for Rehabilitation Management in Patients with Vestibular Schwannoma
Source: MDPI journal article supplement (doi:10.3390/jcm12185947), 2023-09-13
Supplement: s1 [file s1]

## Identification of follow-up markers for rehabilitation management in patients with vestibular schwannoma

**Table S1 : KANZAKI classification**

| Grade | Description                                      |
|-------|--------------------------------------------------|
| I     | Intracanalicular                                 |
| IIa   | Extending 10 mm or less into the posterior fossa |
| IIb   | Extending 11-20 mm into the posterior fossa      |
| III   | Extending 21-30 mm into the posterior fossa      |
| IV    | Extending 31-40 mm into the posterior fossa      |
| V     | Extending 41 mm or more into the posterior fossa |

**Table S2 : AAO-HNS classification**

| Class | 4PTA3 (db) | Speech discrimination (WRS %) |
|-------|------------|-------------------------------|
| I     | 0-30       | 70-100                        |
| II    | 31-50      | 50-69                         |
| III   | >50        | 100-50                        |
| IV    | 0-100      | <50                           |

Legend. 4PTA3: (Pure Tone Hearing Loss) average of the 500, 1000, 2000 and 3000 Hz airway thresholds; WRS: (Word Recognition Score) best score obtained up to a level of SRT + 35 dB or the maximum speech comfort level. If the PTA class does not match the WRS class, it is not specified which class to use. We have opted to apply the recommendations made for the Tokyo classification.

**Table S3: Video Nystagmography (VNG) data and standards**

| Rewiew phase       | Test         | Unit     | Normative references                                |
|--------------------|--------------|----------|-----------------------------------------------------|
| <b>Calibration</b> | L            | ms       | < 280 if L increases, aspecific central involvement |
|                    | V            | °/s      | > 380 if lower: brain stem origin ?                 |
|                    | P            | %        | [80 ; 105] if dysmetria: cerebellar origin?         |
| <b>VNG Kinetic</b> | VVOR         | GAIN     | [0.8 ;1.1] and                                      |
|                    |              | PREP °/s | < 2                                                 |
|                    | VOR, VOR 2   | GAIN     | [0.4 ; 1] and                                       |
|                    |              | PREP °/s | < 2                                                 |
|                    | OFI          | GAIN     | ≤ 0.1 or                                            |
|                    |              | PREP °/s | Near 0                                              |
| <b>VNG Thermal</b> | PA           | °/s      | < 2 and                                             |
|                    | Reflectivity | °/s      | [20 ; 80] and                                       |
|                    | Deficit      | %        | < 30                                                |

Legend: L: latency; V: velocity; P: precision; °/s: degrees per second; %: percentage; ms: millisecond; PREP: preponderance; VVOR: visual-vestibulo-ocular reflex; VOR: vestibulo-ocular reflex; VOR2: vestibulo-ocular reflex in double task; OFI: index of ocular fixation; PA: absolute preponderance.

**Table S4: Data and standards of the Multitest® posturography**

| Conditions         | Description of the conditions | Evaluation parameters | Normative references:              |                    |       |       |       |       |       |      |
|--------------------|-------------------------------|-----------------------|------------------------------------|--------------------|-------|-------|-------|-------|-------|------|
|                    |                               |                       | Age                                |                    | 20-30 | 30-40 | 40-50 | 50-60 | 60-70 | 70+  |
|                    |                               |                       | STABLE EO                          | nb-EO              | 54    | 54    | 61    | 52    | 56    | 56   |
|                    |                               |                       |                                    | mean-EO            | 0.75  | 0.72  | 0.84  | 0.94  | 1.11  | 1.31 |
|                    |                               |                       |                                    | sd-EO              | 0.44  | 0.44  | 0.49  | 0.61  | 0.59  | 0.58 |
| 1                  | STABLE EO                     |                       |                                    | born_inf (2sd)-EO  | -0.14 | -0.16 | -0.14 | -0.28 | -0.08 | 0.14 |
| 2                  | STABLE EC                     | PII                   |                                    | born_sup(2sd)-EO   | 1.64  | 1.60  | 1.82  | 2.16  | 2.30  | 2.48 |
| 3                  | STABLE OKN                    | Abnormal if           | STABLE EC                          | nb-EC              | 54    | 54    | 61    | 52    | 56    | 56   |
| 4                  | UNSTABLE EO                   | above age             |                                    | mean-EC            | 0.91  | 0.93  | 1.01  | 1.13  | 1.22  | 1.59 |
| 5                  | UNSTABLE EC                   | category              |                                    | sd-EC              | 0.44  | 0.63  | 0.57  | 0.58  | 0.58  | 0.65 |
| 6                  | UNSTABLE OKN                  | standards             |                                    | born_inf (2sd)-EC  | 0.02  | -0.32 | -0.14 | -0.03 | 0.06  | 0.29 |
|                    |                               |                       |                                    | born_sup(2sd)-EC   | 1.80  | 2.19  | 2.16  | 2.29  | 2.39  | 2.89 |
|                    |                               |                       | STABLE OKN                         | nb-OKN             | 54    | 54    | 61    | 52    | 56    | 56   |
|                    |                               |                       |                                    | mean-OKN           | 1.66  | 1.76  | 1.95  | 2.14  | 2.51  | 2.86 |
|                    |                               |                       |                                    | sd-OKN             | 0.89  | 0.96  | 1.08  | 0.82  | 0.85  | 1.03 |
|                    |                               |                       |                                    | born_inf (2sd)-OKN | -0.13 | -0.16 | -0.21 | 0.50  | 0.81  | 0.80 |
|                    |                               |                       |                                    | born_sup(2sd)-OKN  | 3.45  | 3.67  | 4.11  | 3.78  | 4.21  | 4.92 |
| All<br>(3+6)/(2+5) |                               | FALL<br>VD            | None in the 6 conditions<br>Near 0 |                    |       |       |       |       |       |      |

Legend: EO: eyes open; EC: eyes closed; OKN: optokinetic; VD: visual dependence; PII: postural instability index; SD: standard deviation.

**Table S5: Subjective visual vertical (SVV) data and standards**

| Conditions | Unit | Normative values |
|------------|------|------------------|
| Static     | °    | [-2.5 ; 2.5]     |

Legend : ° : degree

**Table S6 : le Dizziness Handicap Inventory (DHI)**

| Scale          | Number of objects | After recording, number of each item |   |    |    |    |    |    |    |    |
|----------------|-------------------|--------------------------------------|---|----|----|----|----|----|----|----|
| Physical (P)   | 7                 | 1                                    | 4 | 8  | 11 | 13 | 17 | 25 |    |    |
| Emotional (E)  | 9                 | 2                                    | 9 | 10 | 15 | 18 | 20 | 21 | 22 | 23 |
| Functional (F) | 9                 | 3                                    | 5 | 6  | 7  | 12 | 14 | 16 | 19 | 24 |

Conversion steps: The elements are recoded according to the following conditions yes = 4, sometimes = 2 no = 0; the scores are averaged per dimension. In fine, each dimension is plotted as a % with maximum scores per dimension P=28; E= 36; F=36.

**Table S7: Le Penn Acoustic Neuroma Quality-of-Life (PANQOL)**

| Scale          | Number of objects | After recording, classification by dimension and conversion of scores |    |    |    |    |    |  |
|----------------|-------------------|-----------------------------------------------------------------------|----|----|----|----|----|--|
| Balance        | 6                 | 4                                                                     | 5  | 6  | 7  | 8  | 9  |  |
| Hearing        | 4                 | 1                                                                     | 2  | 3  | 20 |    |    |  |
| Anxiety        | 4                 | 1                                                                     | 2  | 3  | 20 |    |    |  |
| Energy         | 6                 | 13                                                                    | 17 | 21 | 22 | 23 | 24 |  |
| Pain           | 1                 | 14                                                                    |    |    |    |    |    |  |
| Face           | 1                 | 10                                                                    | 11 | 12 |    |    |    |  |
| General Health | 2                 | 25                                                                    | 26 |    |    |    |    |  |

Conversion steps: Items are recoded as follows: 1 = 0; 2 = 25; 3 = 50; 4 = 75; 5 = 100 except for item 25: 1 = 100; 2 = 75; 3 = 50; 4 = 25; 5 = 0. Once the average per dimension has been established, conversion into % using the following score conversion formula: [Actual domain score - Minimum possible domain score] / [Maximum possible domain score - Minimum possible domain score].

**Table S8: Le Short Form (36) health survey (SF 36)**

| Scale                                      | Number of objects | After recording to table 1, average the following elements |      |      |      |      |     |     |     |     |     |  |
|--------------------------------------------|-------------------|------------------------------------------------------------|------|------|------|------|-----|-----|-----|-----|-----|--|
| Physical functioning                       | 10                | Q3a                                                        | Q3b  | Q3c  | Q3d  | Q3e  | Q3f | Q3g | Q3h | Q3i | Q3j |  |
| Role limitations due to physical health    | 4                 | Q4a                                                        | Q4b  | Q4c  | Q4d  |      |     |     |     |     |     |  |
| Role limitations due to emotional problems | 3                 | Q5a                                                        | Q5b  | Q5c  |      |      |     |     |     |     |     |  |
| Energy / fatigue                           | 4                 | Q9a                                                        | Q9e  | Q9g  | Q9i  |      |     |     |     |     |     |  |
| Emotional well-being                       | 5                 | Q9b                                                        | Q9c  | Q9d  | Q9f  | Q9h  |     |     |     |     |     |  |
| Social Functioning                         | 2                 | Q6                                                         | Q10  |      |      |      |     |     |     |     |     |  |
| Pain                                       | 2                 | Q7                                                         | Q8   |      |      |      |     |     |     |     |     |  |
| General health                             | 5                 | Q1                                                         | Q11a | Q11b | Q11c | Q11d |     |     |     |     |     |  |
| Declared health transmission               | 1                 | Q2                                                         |      |      |      |      |     |     |     |     |     |  |

Conversion stage: Items are recoded according to the 1992 interpretation manual. Once the average of each dimension has been established, conversion into % is carried out using the following formula = ((Patient's average raw score - Lowest possible raw score) / (Possible raw range score)).

**Table S9: Link between compliance and non-compliance status between the 4 variables on which the standards are defined**

| Link studied | Link coefficient |
|--------------|------------------|
| VVOR et VOR  | 0.291            |
| VVOR et VOR2 | 0.262            |
| VVOR et OFI  | 0.052            |
| VOR et VOR2  | <b>0.734</b>     |
| VOR et OFI   | 0.135            |
| VOR2 et OFI  | 0.207            |

Reading key: the closer the link is to 1, the stronger it is and the more this means that the change in one of the elements is accompanied by a change in the other element.

Legend: VVOR: kinetic burst test of the visuo-vestibular-ocular reflex, VOR: kinetic burst test of the vestibulo-ocular reflex, VOR2: double-task test of the vestibulo-ocular reflex, OFI: kinetic burst test with ocular fixation.

**Table S10: Breakdown of workforce according to whether they have standardised thermal VNG indicators for periods T1, T2, T3**

|           | Absolute preponderance |             | Reflectivity |             | Deficit |             |
|-----------|------------------------|-------------|--------------|-------------|---------|-------------|
|           | n                      | %           | n            | %           | n       | %           |
| <b>T1</b> | 20                     | <b>62.5</b> | 23           | <b>72.0</b> | 8       | <b>25.0</b> |
| <b>T2</b> | 10                     | <b>31.2</b> | 4            | <b>12.5</b> | 0       | <b>00.0</b> |
| <b>T3</b> | 19                     | <b>59.4</b> | 17           | <b>53.1</b> | 0       | <b>00.0</b> |

Reading key: at T1, 10 out of 32 patients had an absolute preponderance within the norms, 4 had reflectivity within the norms and none had a normalised deficit.
